# Supplementary material for: Acid–base resistant ligand-modified molybdenum–sulfur clusters with enhanced photocatalytic activity towards hydrogen evolution
Source: Royal Society of Chemistry journal article supplement (doi:10.1039/d2ta00352j), 2022-01-01
Supplement: d2ta00352j1.pdf [file d2ta00352j1.pdf]

## *Electronic Supplementary Information*

# **Acid-base resistant ligand-modified molybdenum-sulfur clusters with enhanced photocatalytic activity towards hydrogen evolution**

Hui-Li Zheng,<sup>a,b</sup> Jian-Qiang Zhao,<sup>a</sup> Jian Zhang,<sup>\*a</sup> and Qipu Lin<sup>\*a</sup>

*<sup>a</sup> State Key Laboratory of Structural Chemistry, Fujian Institute of Research on the Structure of Matter, Chinese Academy of Sciences, Fuzhou, Fujian 350002, China.*

*E-mail: [linqipu@fjirsm.ac.cn](mailto:linqipu@fjirsm.ac.cn), [zhj@fjirsm.ac.cn](mailto:zhj@fjirsm.ac.cn)*

*<sup>b</sup> University of Chinese Academy of Sciences, Beijing 100049, China.*

| <b>Table of Contents</b> |                                                                                                                                                                                        |
|--------------------------|----------------------------------------------------------------------------------------------------------------------------------------------------------------------------------------|
| <b>Experimental</b>      | Synthetic procedure and equipment.                                                                                                                                                     |
| <b>Figure S1</b>         | The relationship of the [Mo <sub>3</sub> S <sub>7</sub> ] SBUs to the monolayer MoS <sub>2</sub> with sulfur-rich edges.                                                               |
| <b>Figure S2</b>         | The PXRD patterns of simulated and experiment of (NEt <sub>4</sub> ) <sub>2</sub> Mo <sup>IV</sup> <sub>3</sub> S <sub>7</sub> Br <sub>6</sub> .                                       |
| <b>Figure S3</b>         | (a) The crystal structure of compound MoS-MBTZ by side and top view; (b) The packing diagrams of compound MoS-MBTZ in the view of a-axis, b-axis and c-axis.                           |
| <b>Figure S4</b>         | Summary of compounds with trinuclear [Mo <sub>3</sub> S <sub>7</sub> ] SBUs.                                                                                                           |
| <b>Figure S5</b>         | The PXRD patterns of simulated, MoS-MBTZ bulk crystal and MoS-MBTZ microscale crystal.                                                                                                 |
| <b>Figure S6</b>         | The TGA curve of MoS-MBTZ.                                                                                                                                                             |
| <b>Figure S7</b>         | The high-resolution XPS spectra of Mo 3 <i>d</i> of compound MoS-MBTZ.                                                                                                                 |
| <b>Figure S8</b>         | The experimental and calculated ESI-MS spectra of MoS-MBTZ.                                                                                                                            |
| <b>Figure S9</b>         | UV-vis absorption spectra of MoS-MBTZ and MoS-Br.                                                                                                                                      |
| <b>Figure S10</b>        | Photocatalytic H <sub>2</sub> evolution from a mixed solution of organic solvent and H <sub>2</sub> O at a volume ratio of 9:1.                                                        |
| <b>Figure S11</b>        | Photocatalytic H <sub>2</sub> evolution from a mixed solution of CH <sub>3</sub> CN and H <sub>2</sub> O at different volume ratio.                                                    |
| <b>Figure S12</b>        | Photocatalytic H <sub>2</sub> evolution from a mixed solution of CH <sub>3</sub> CN and H <sub>2</sub> O at a volume ratio of 9:1 with different electron donor.                       |
| <b>Figure S13</b>        | Photocatalytic H <sub>2</sub> evolution of MoS-MBTZ in recycling experiments.                                                                                                          |
| <b>Figure S14</b>        | The XRD of MoS-MBTZ before and after photocatalysis.                                                                                                                                   |
| <b>Figure S15</b>        | The SEM image of MoS-MBTZ before and after photocatalysis.                                                                                                                             |
| <b>Figure S16</b>        | The FT-IR of MoS-MBTZ before and after photocatalysis.                                                                                                                                 |
| <b>Figure S17</b>        | The XPS image of MoS-MBTZ before and after photocatalysis.                                                                                                                             |
| <b>Figure S18</b>        | The ESI-MS of MoS-MBTZ before and after photocatalysis.                                                                                                                                |
| <b>Figure S19</b>        | Photocatalytic H <sub>2</sub> evolution of MoS-MBTZ after soaking in different pH solutions for one month.                                                                             |
| <b>Figure S20</b>        | The steady-state fluorescence spectra of [Ru(bpy) <sub>3</sub> ]Cl <sub>2</sub> upon the addition of increasing amounts of TEOA in the CH <sub>3</sub> CN/H <sub>2</sub> O solution.   |
| <b>Figure S21</b>        | The steady-state fluorescence spectra of [Ru(bpy) <sub>3</sub> ]Cl <sub>2</sub> upon the addition of increasing amounts of MoS-Br in the CH <sub>3</sub> CN/H <sub>2</sub> O solution. |
| <b>Figure S22</b>        | The EIS Nyquist plots for MoS-MBTZ and MoS-Br.                                                                                                                                         |
| <b>Figure S23</b>        | The molecular orbitals of HOMO (a) and LUMO (b) for MoS-Br.                                                                                                                            |
| <b>Figure S24</b>        | The PDOS of Mo-4 <i>d</i> , S-3 <i>p</i> and Br-4 <i>p</i> for MoS-Br.                                                                                                                 |
| <b>Table S1</b>          | Crystal data and structure refinement for MoS-MBTZ.                                                                                                                                    |

|                 |                                                                                                                                                                  |
|-----------------|------------------------------------------------------------------------------------------------------------------------------------------------------------------|
| <b>Table S2</b> | Selected bond lengths and angles for MoS-MBTZ.                                                                                                                   |
| <b>Table S3</b> | Photocatalytic H <sub>2</sub> evolution from a mixed solution of different organic solvent and H <sub>2</sub> O at a volume ratio of 9:1.                        |
| <b>Table S4</b> | Photocatalytic H <sub>2</sub> evolution from a mixed solution of CH <sub>3</sub> CN and H <sub>2</sub> O at a different volume ratio.                            |
| <b>Table S5</b> | Photocatalytic H <sub>2</sub> evolution from a mixed solution of CH <sub>3</sub> CN and H <sub>2</sub> O at a volume ratio of 9:1 with different electron donor. |
| <b>Table S6</b> | Summary of state-of-art photocatalysts for H <sub>2</sub> evolution of water splitting.                                                                          |
| <b>Table S7</b> | Control photocatalytic experiments using MoS-MBTZ as catalyst.                                                                                                   |

## Materials:

Precursor  $(\text{NEt}_4)_2\text{Mo}_3\text{S}_7\text{Br}_6$  was synthesized by a reported procedure.<sup>1</sup> Other chemical reagents were obtained from commercial supply without further purification. 2-mercaptobenzothiazole (MBTZ, 99.8%, J&K),  $[\text{Ru}(2,2'\text{-bipyridine})_3]\text{Cl}_2 \cdot 6\text{H}_2\text{O}$  ( $[\text{Ru}(\text{bpy})_3]\text{Cl}_2$ , 99%, Aladdin), N,N-dimethylformamide (DMF, 99%, Aladdin), ethyl acetate (99%, Aladdin), acetonitrile (MeCN, 99%, Aladdin), methanol (MeOH, 99%, Aladdin), triethanolamine (TEOA, 99%, Aladdin), tetrafluoroboric acid ( $\text{HBF}_4$ , 99%, Aladdin). Deionized water was generated by the Hitech purified water system.

## Synthesis of block crystal of MoS-MBTZ:

The mixture of  $(\text{NEt}_4)_2\text{Mo}_3\text{S}_7\text{Br}_6$  (125.1 mg, 0.1 mmol) and 2-mercaptobenzothiazole (54.3 mg, 0.3 mmol) were dissolved in 1 mL DMF and 2 mL ethyl acetate in a 20 mL glass vial. Three drops  $\text{HBF}_4$  were added to the above solution and stirred for half an hour. Then, the mixture was heated at 100 °C for 48 h, followed by cooling to room temperature. Lots of orange needle crystals were filtrated from the vial and washed with ethanol three times (ca. 68% yield based on  $(\text{NEt}_4)_2\text{Mo}_3\text{S}_7\text{Br}_6$ ). The structure was subsequently determined to be  $\text{Mo}_3\text{S}_{13}\text{BrC}_{21}\text{H}_{12}\text{N}_3$  by using the single crystal X-ray diffraction. Elemental analysis calculated (%): C 23.12; H 1.11; N 3.85. Found (%): C 23.07; H 1.20; N 3.77. Selected IR (KBr pellet,  $\text{cm}^{-1}$ ):  $\nu$  ( $\text{cm}^{-1}$ ) = 3440 (m), 3049 (w), 1587 (w), 1456 (m), 1386 (s), 1089 (s), 1039 (s), 1016 (m), 752 (s), 694 (w), 520 (w).

## Synthesis of MoS-MBTZ microcrystal:

$(\text{NEt}_4)_2\text{Mo}_3\text{S}_7\text{Br}_6$  (125.1 mg, 0.1 mmol) and 2-mercaptobenzothiazole (54.3 mg, 0.3 mmol) were dissolved in 6 mL DMF and 12 mL ethyl acetate. Three drops of  $\text{HBF}_4$  were added to the above solution. Then, the mixture was refluxed at 100 °C for 12 h. The orange microcrystals were obtained and confirmed by powder X-ray diffraction.

## Characterizations:

Fourier transform infrared (FT-IR) spectra were recorded from KBr pellets containing 1% of the compound in the range of 400~4000  $\text{cm}^{-1}$  on a Nicolet Magna 750 FT-IR spectrometer. Elemental analysis of C, H, N were performed on a Vario EL-Cube. Thermal gravimetric analysis (TGA) was carried out on a Netzsch STA449F3 thermal analyzer at a temperature range of 25 to 800 °C under  $\text{N}_2$  atmosphere with a heating rate of 10 °C  $\text{min}^{-1}$ . Powder X-ray diffraction (PXRD) patterns of the samples were recorded by a Rigaku Dmax 2500 X-ray

diffractometer with Cu  $K\alpha$  radiation ( $\lambda = 1.54056 \text{ \AA}$ ). Scanning electron microscopy (SEM) images were obtained by a Zeiss Sigma 500. Surface chemical analyses were performed by X-ray photoelectron spectroscopy (XPS, Thermo Fisher, ESCALAB 250Xi). Ultraviolet-visible (UV-Vis) diffuse-reflectance spectra (DRS) were performed on a Shimadzu UV-1201PC spectrophotometer. Steady-state photoluminescence (PL) spectra and time-resolved PL decay spectra were performed on a FLS980 Spectrometer.

### **X-ray Crystallography:**

The diffraction data sets were collected on a Bruker Smart Apex CCD diffractometer with graphite monochromatic Mo- $K\alpha$  radiation ( $\lambda = 0.71073 \text{ \AA}$ ) at 293 K. The structures were solved by direct methods and refined by full-matrix least-squares on  $F^2$  using SHELXL-2014.<sup>2</sup> All non-hydrogen atoms were refined using anisotropic displacement parameters. The hydrogen atoms of the ligand were generated geometrically. The structure figures were produced by Diamond 4.0 software. Crystallographic details are provided in Table S1 and selected bond lengths and angles are listed in Table S2. The crystal structure of compound has been deposited and CCDC numbers are 2123562 for MoS-MBTZ.

### **Photocatalytic hydrogen evolution reactions:**

The photocatalytic hydrogen production experiments were performed in a sealed Pyrex reactor (250 mL) with a top flat quartz window for light irradiation and a silicone rubber septum was fixed on its side for sampling produced  $H_2$  in the headspace of reaction cell. Catalyst (5 mg) and  $[Ru(bpy)_3]Cl_2$  (15 mg) were added into the mixed solution of  $CH_3CN/H_2O$  (9:1) containing 10% TEOA with magnetic stirring and the total amount of solution was 60mL. After degassing with  $N_2$  to remove dissolved air for 20 min, the reaction was performed under the irradiation of a 300 W Xe lamp with UV and IR-cut to keep the wavelengths in the range from 420 to 800 nm. Keeping the reaction temperature at 298K by using the cooling water circulation. The generated gas products were analyzed by a gas chromatography analyzer (FULI 9790II) equipped with the thermal conductivity detector (TCD).

### **Photo/electrochemical measurements:**

Mott-Schottky plots were measured on an IM 6 electrochemical system in 0.2 M  $Na_2SO_4$  electrolyte at room temperature with Ag/AgCl electrode as the reference electrode and Pt plate as the counter electrode, at the frequencies of 500, 1000 and 1500 Hz. The electrochemical impedance spectra (EIS) and photocurrent tests were performed on the CHI660E

electrochemical workstation using a standard three-electrode system, consisting of an F-doped SnO<sub>2</sub> (FTO) electrode coated with photocatalyst, a Pt plate counter-electrode, and an Ag/AgCl reference electrode. Preparation of working electrodes: Sample (5 mg) were dispersed in the solution containing ethanol (0.5 mL), acetonitrile (0.5 mL) and Nafion (10 μL) then ultrasonication for 30 min. 20 μL of the prepared suspension was pipetted onto the FTO (0.25 cm<sup>2</sup>) and dried at ambient temperature.

#### **Electrospray Mass spectrometry measurement:**

Electrospray ionization mass spectrometry (ESI-MS) measurements were conducted with a Thermo Exactive spectrometer in positive ion mode at a capillary temperature of 275 °C. The spectrometer was previously calibrated with the standard tune mix to give a precision of ca. 2 ppm in the region of 50-4000 m/z. Aliquots of the solution were injected into the device at 0.3 mL/h. The capillary voltage was 50 V, the tube lens voltage was 150 V and the skimmer voltage was 25 V. The in-source energy was set to 0-100 eV with a gas flow rate at 10 mL/min of the maximum. The mass spectrometry data was analyzed by the software of Thermo Foundation 4.0.

#### **Theoretical band calculation:**

The single crystal data of compounds MoS-MBTZ and MoS-Br were directly used to calculate the electronic band structure in Castep software. The total energy was calculated with density functional theory (DFT) using Perdew-Burke-Ernzerhof (PBE) generalized gradient approximation.<sup>3</sup> The interactions between the ionic cores and the electrons were described by the norm-conserving pseudopotential. Hence, the C-2s<sup>2</sup>2p<sup>2</sup>, N-2s<sup>2</sup>2p<sup>3</sup>, H-1s<sup>1</sup>, Mo-4d<sup>5</sup>5s<sup>1</sup>, S-3s<sup>2</sup>3p<sup>4</sup> and Br-4s<sup>2</sup>4p<sup>5</sup> orbital were adopted as valence electrons. The number of plane wave included in the basis sets was determined by a cutoff energy of 320 eV and numerical integration of the Brillouin zone is performed using Monkhorst-Pack k-point sampling of 2×2×2. Other calculating parameters and convergence criteria were set by the default values of the CASTEP code.

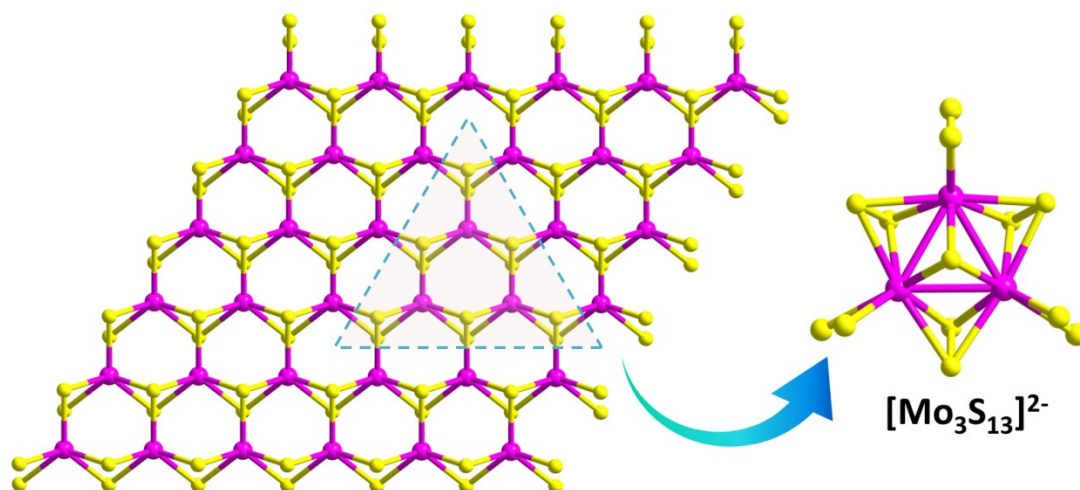

Fig. S1 The relationship of the  $[\text{Mo}_3\text{S}_7]$  SBUs to the monolayer  $\text{MoS}_2$  with sulfur-rich edges.

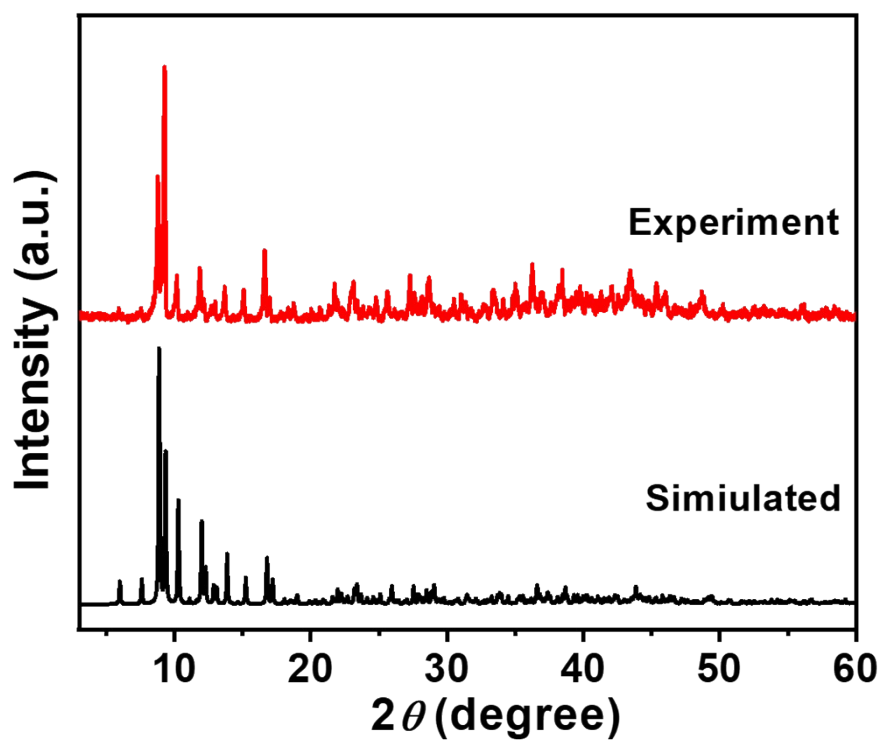

Fig. S2 The PXRD patterns of simulated and experiment of  $(\text{NEt}_4)_2\text{Mo}^{\text{IV}}_3\text{S}_7\text{Br}_6$ .

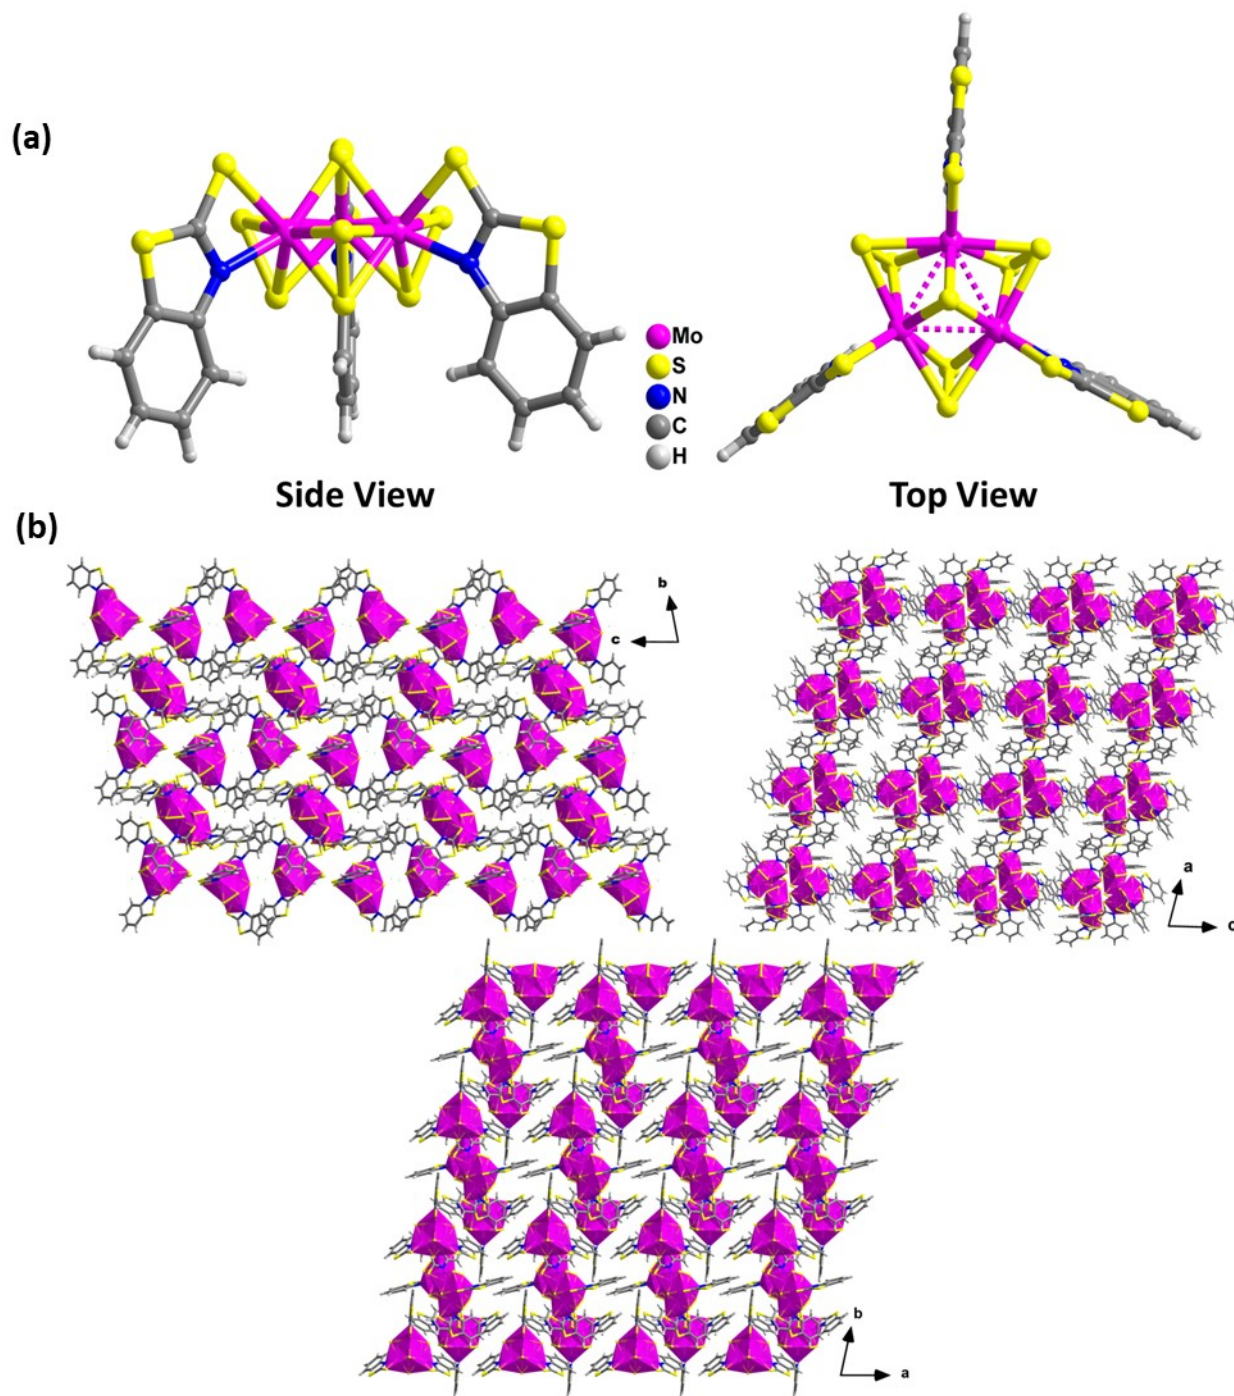

**Fig. S3** (a) The crystal structure of compound MoS-MBTZ by side and top view; (b) The packing diagrams of compound MoS-MBTZ in the view of  $a$ -axis,  $b$ -axis and  $c$ -axis.



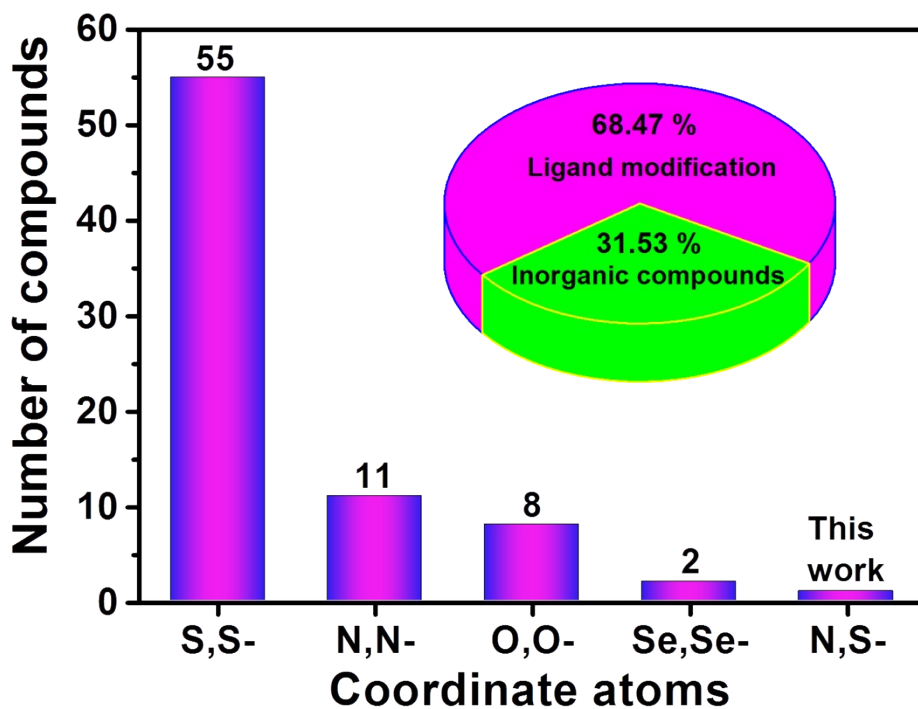

**Fig. S4** Summary of compounds with trinuclear  $[Mo_3S_7]$  SBUs. All information was surveyed from CCDC database [CSD version 5.42 updates (Sep 2021)].

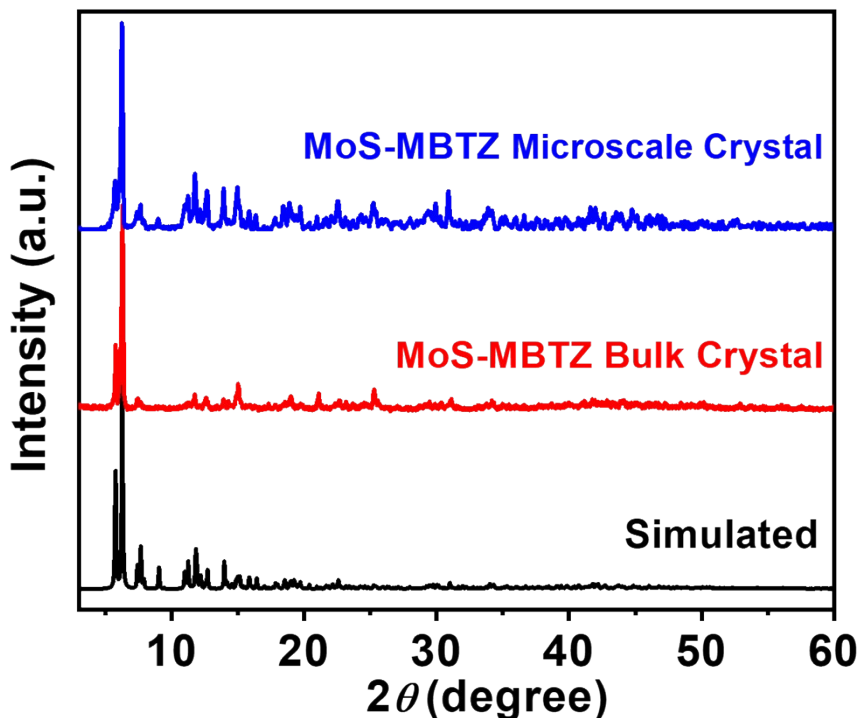

**Fig. S5** The PXRD patterns of simulated, MoS-MBTZ bulk crystal and MoS-MBTZ microscale crystal.

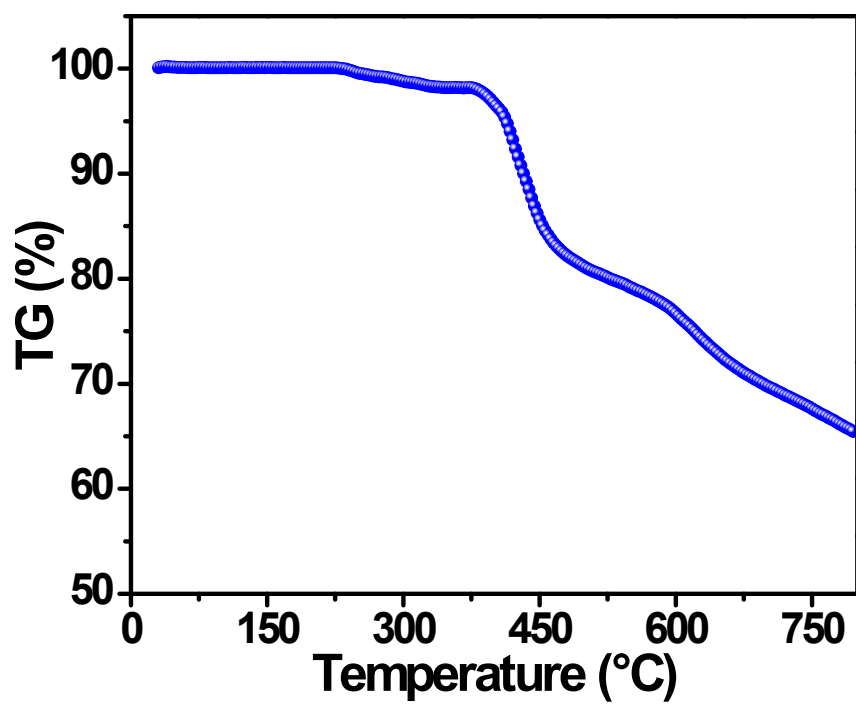

Fig. S6 The TGA curve of MoS-MBTZ.

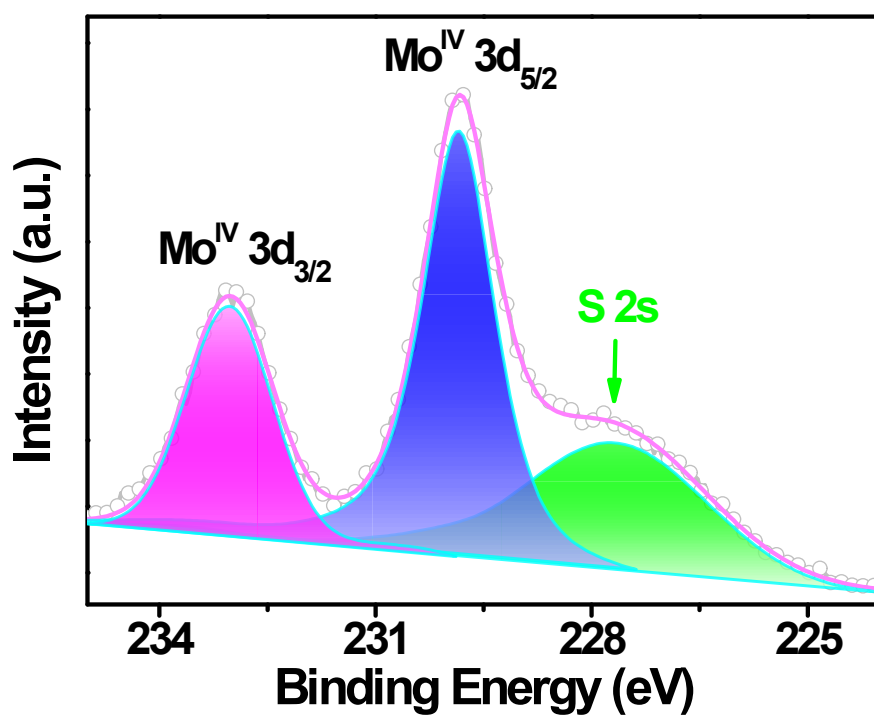

Fig. S7 The high-resolution XPS spectra of Mo 3d of compound MoS-MBTZ.

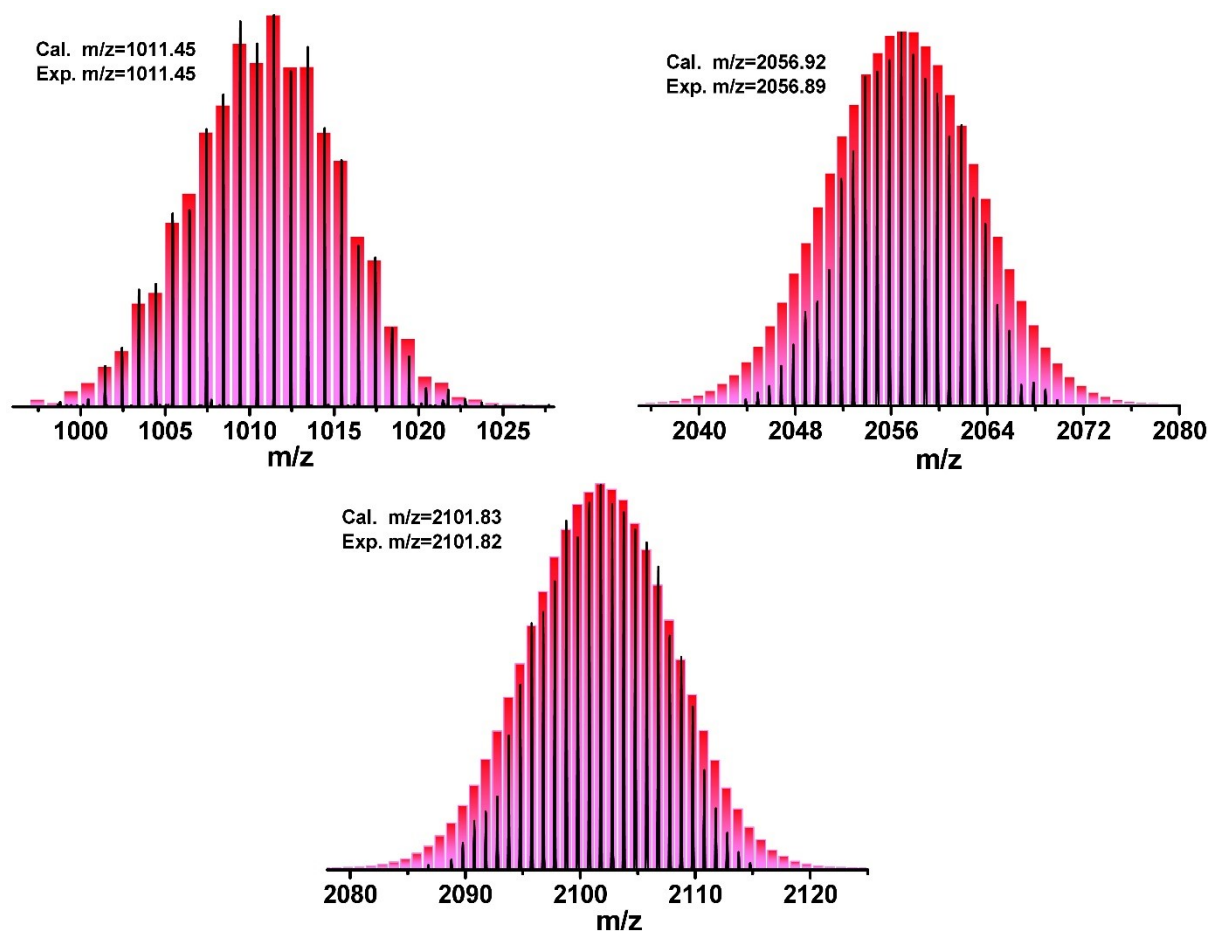

**Fig. S8** The experimental and calculated ESI-MS spectra of MoS-MBTZ for  $[\text{Mo}_3\text{S}_7(\text{MBTZ})_3]^+$  ( $m/z = 1011.45$ ),  $\{[\text{Mo}_3\text{S}_7(\text{MBTZ})_3]_2(\text{OH})(\text{H}_2\text{O})\}^+$  ( $m/z = 2056.89$ ),  $\{[\text{Mo}_3\text{S}_7(\text{MBTZ})_3]_2\text{Br}\}^+$  ( $m/z = 2101.82$ ) fragments .

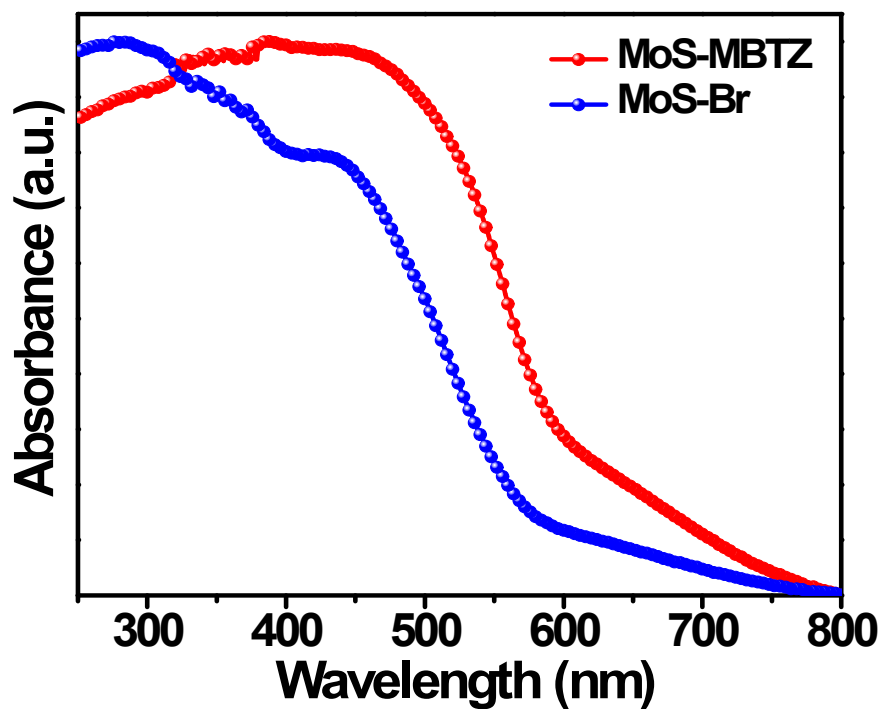

Fig. S9 UV-vis absorption spectra of MoS-MBTZ and MoS-Br.

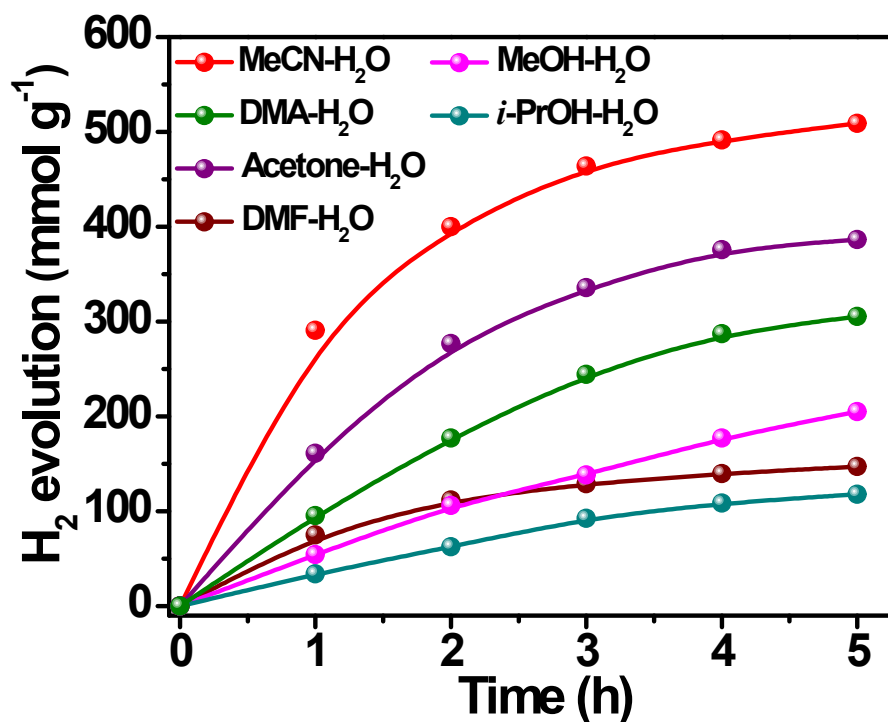

Fig. S10 Photocatalytic H<sub>2</sub> evolution from a mixed solution of organic solvent and H<sub>2</sub>O at a volume ratio of 9:1 with [Ru(bpy)<sub>3</sub>]Cl<sub>2</sub> and TEOA as the photosensitizer and electron donor.

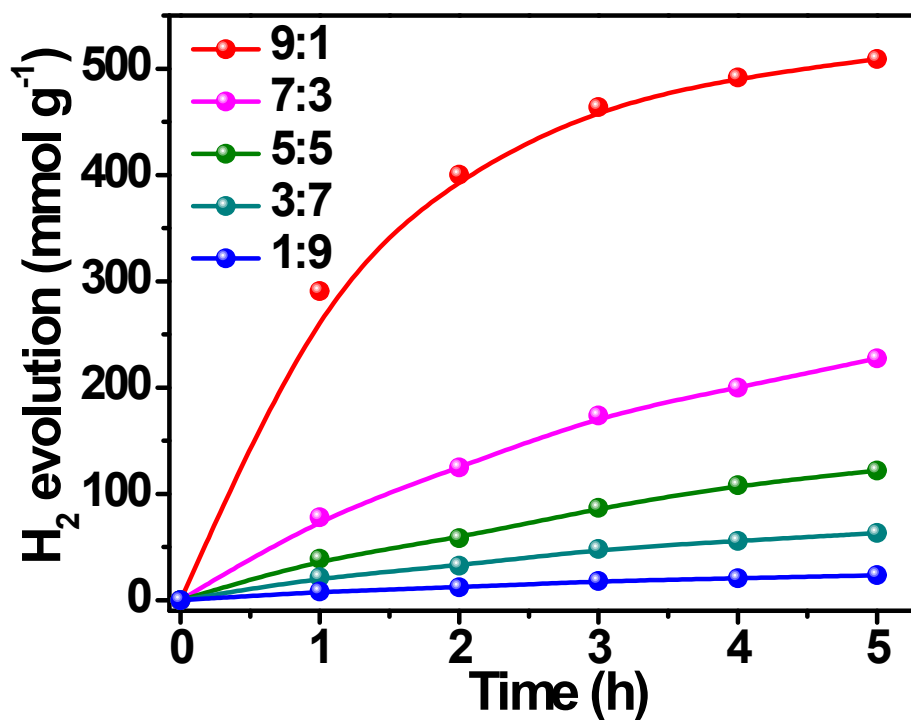

**Fig. S11** Photocatalytic H<sub>2</sub> evolution from a mixed solution of CH<sub>3</sub>CN and H<sub>2</sub>O at different volume ratio with [Ru(bpy)<sub>3</sub>]Cl<sub>2</sub> and TEOA as the photosensitizer and electron donor.

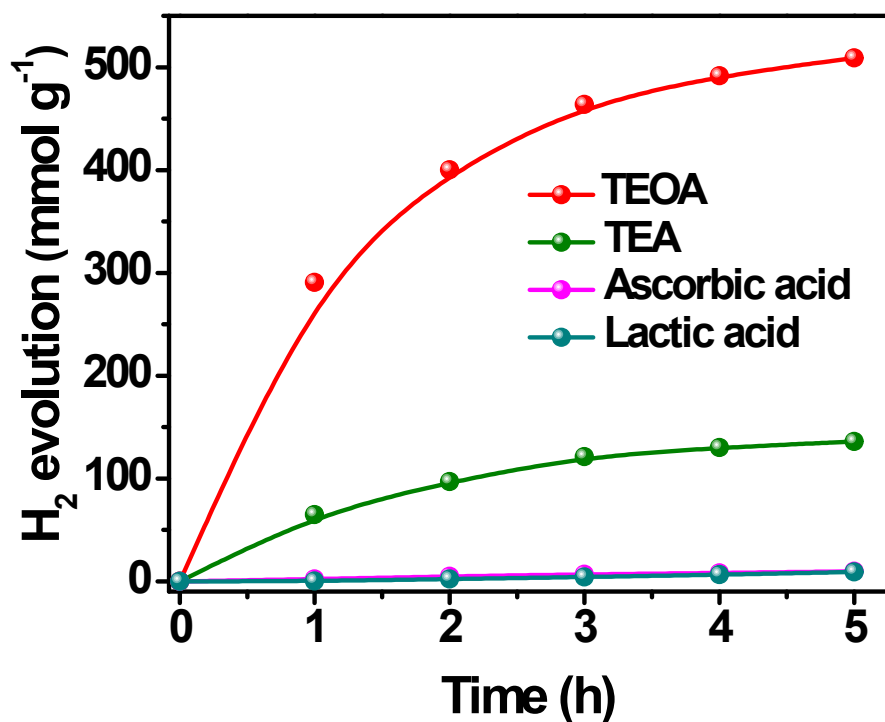

**Fig. S12** Photocatalytic H<sub>2</sub> evolution from a mixed solution of CH<sub>3</sub>CN and H<sub>2</sub>O at a volume ratio of 9:1 with different electron donor.

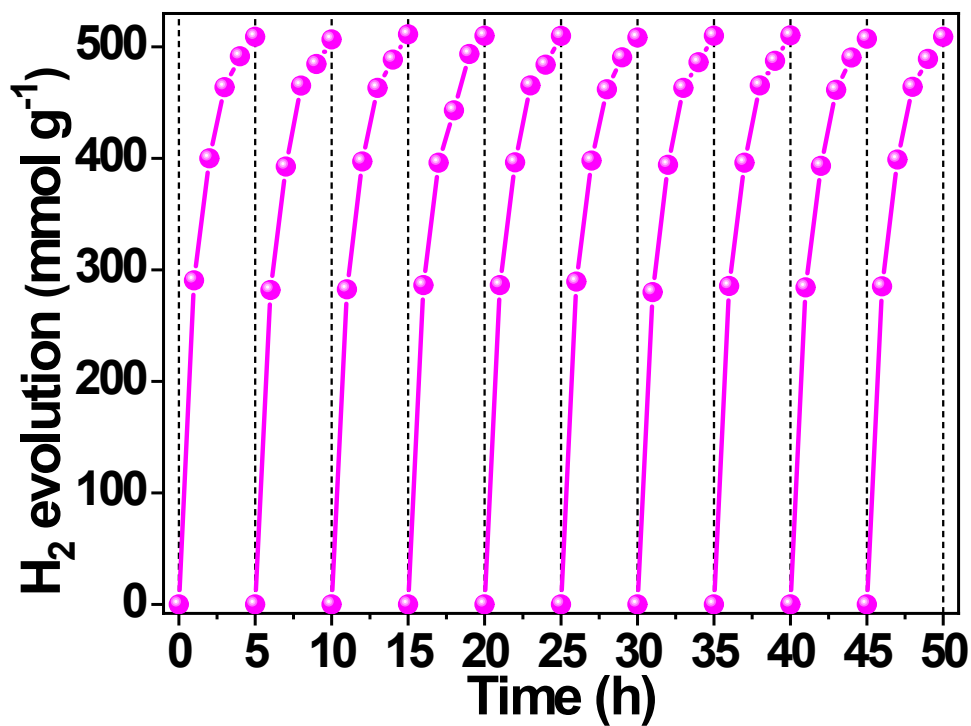

Fig. S13 Photocatalytic H<sub>2</sub> evolution of MoS-MBTZ in recycling experiments.

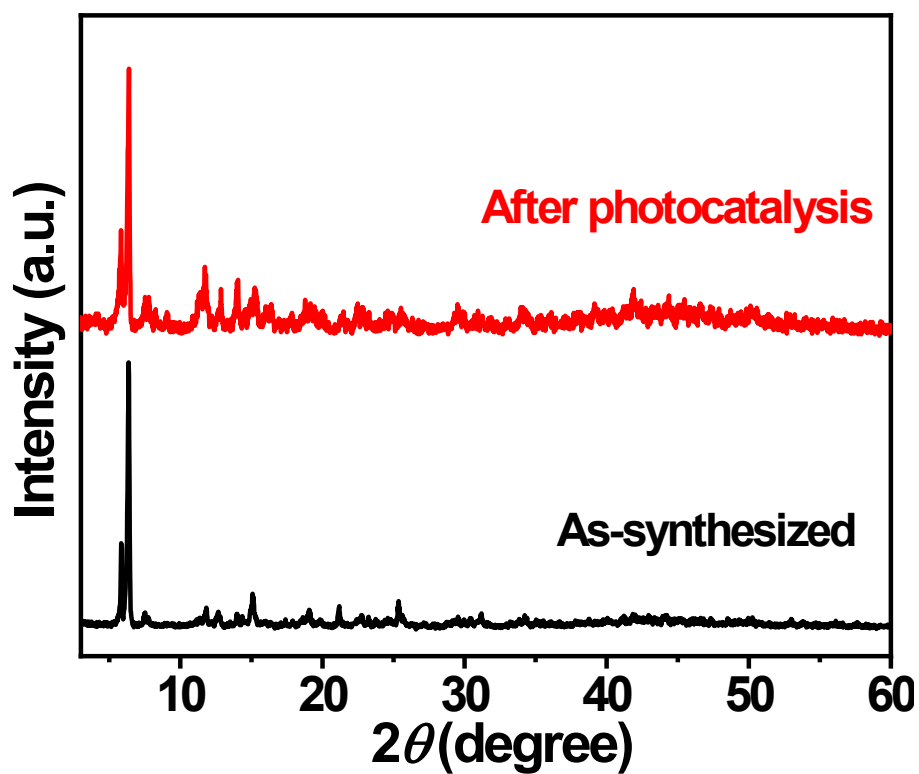

Fig. S14 The XRD of MoS-MBTZ before and after photocatalysis.

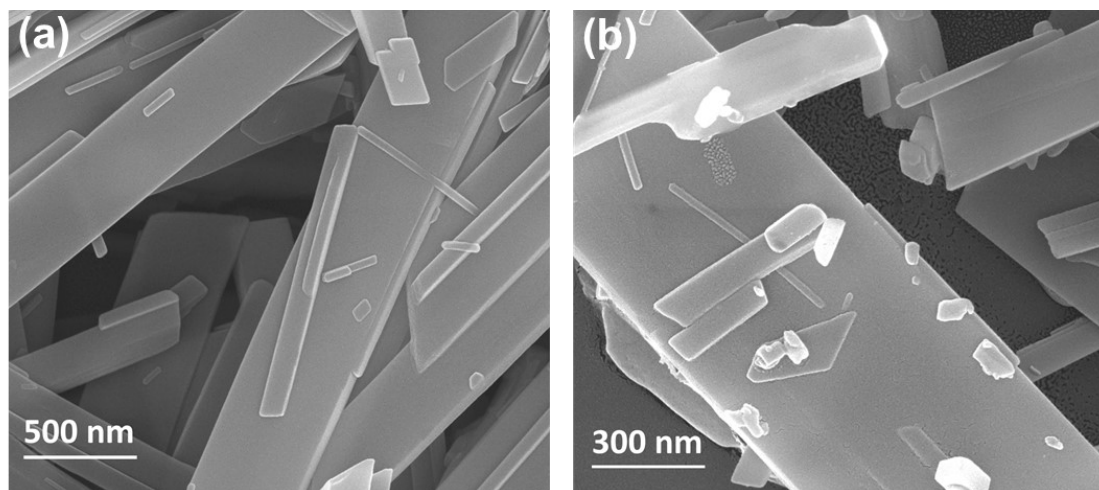

**Fig. S15** The SEM image of MoS-MBTZ before (a) and after (b) photocatalysis.

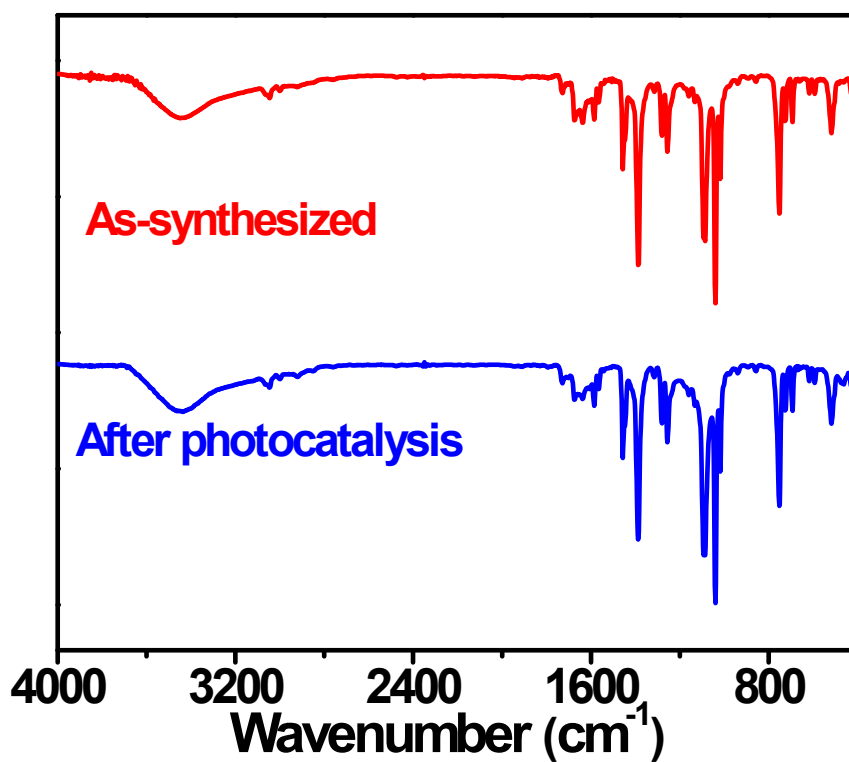

**Fig. S16** The FT-IR of MoS-MBTZ before and after photocatalysis.

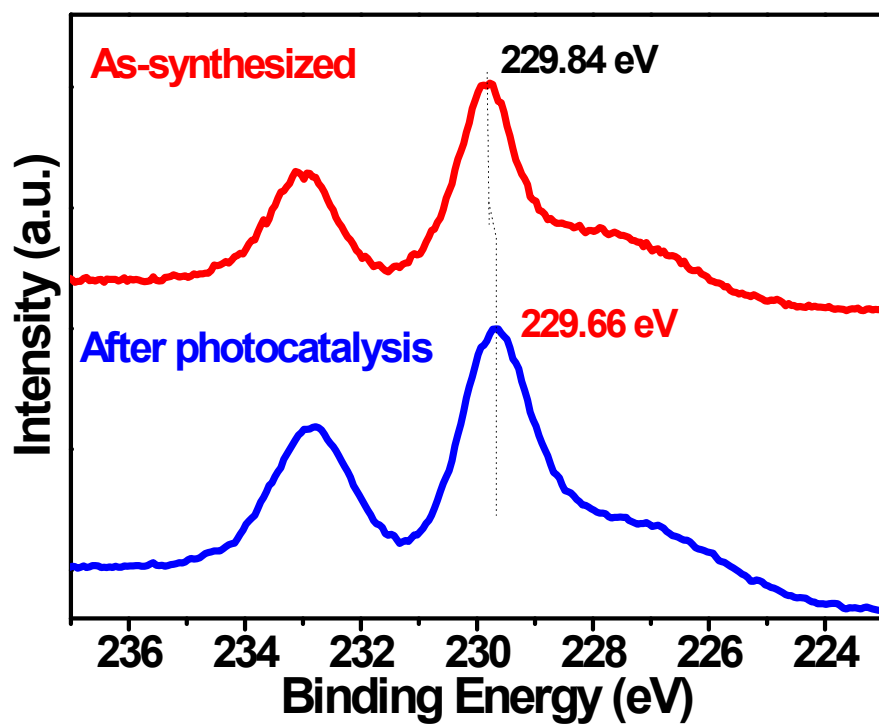

Fig. S17 The XPS image of MoS-MBTZ before and after photocatalysis.

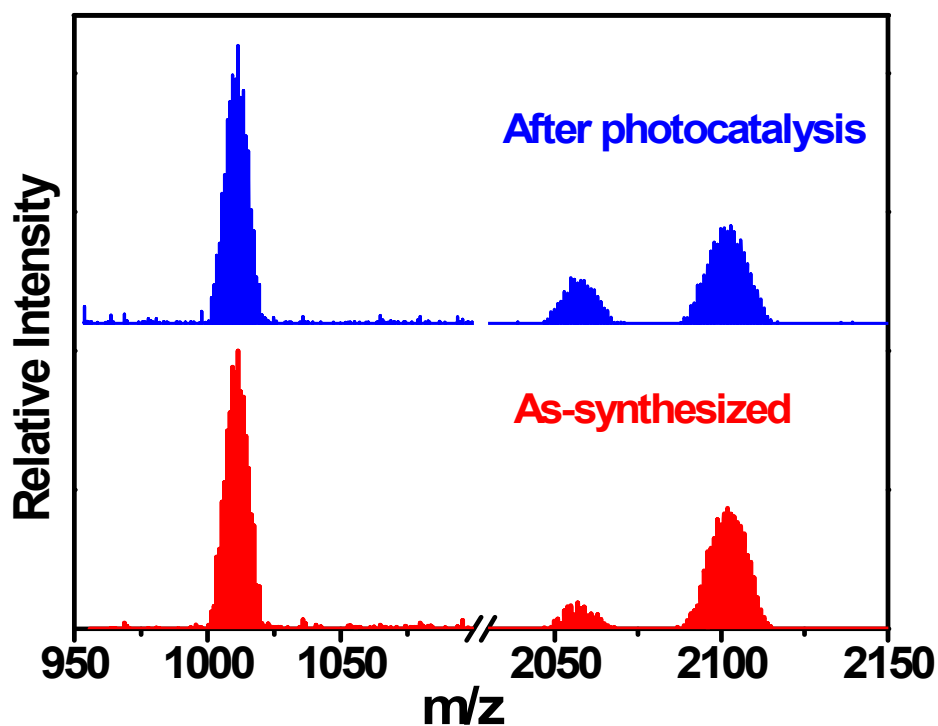

Fig. S18 The ESI-MS of MoS-MBTZ before and after photocatalysis.



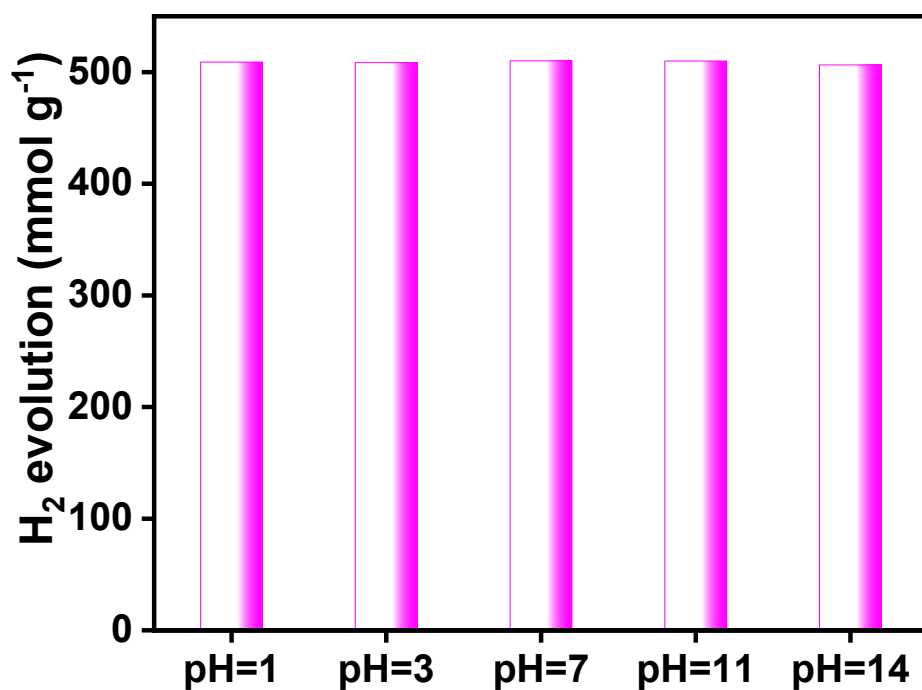

**Fig. S19** Photocatalytic H<sub>2</sub> evolution of MoS-MBTZ after soaking in different pH solutions for one month.

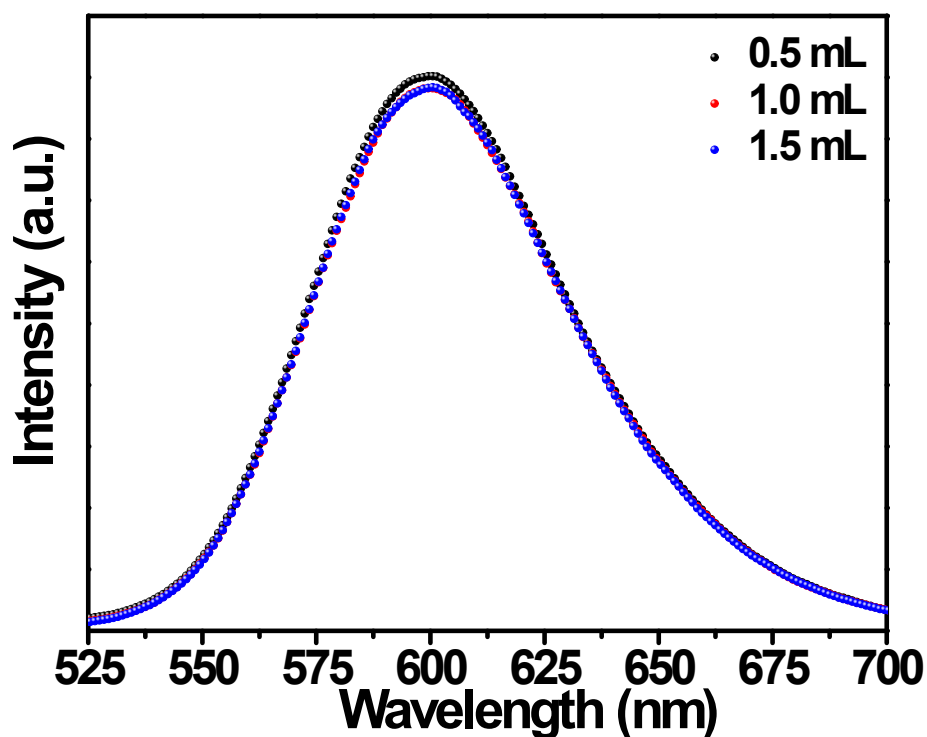

**Fig. S20** The steady-state fluorescence spectra of [Ru(bpy)<sub>3</sub>]Cl<sub>2</sub> upon the addition of increasing amounts of TEOA in the CH<sub>3</sub>CN/H<sub>2</sub>O solution.

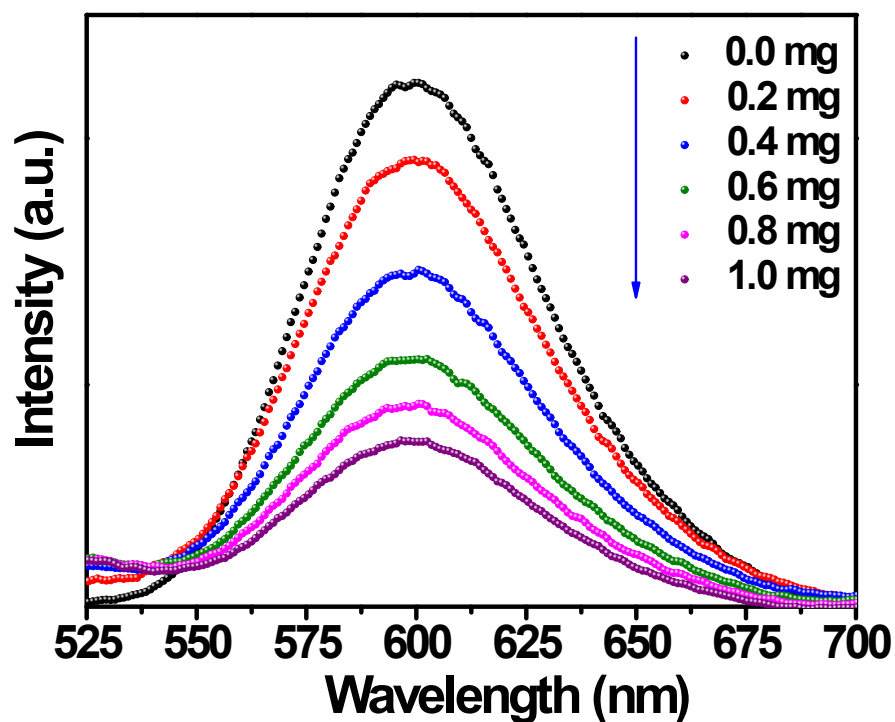

**Fig. S21** The steady-state fluorescence spectra of [Ru(bpy)<sub>3</sub>]Cl<sub>2</sub> upon the addition of increasing amounts of MoS-Br in the CH<sub>3</sub>CN/H<sub>2</sub>O solution.

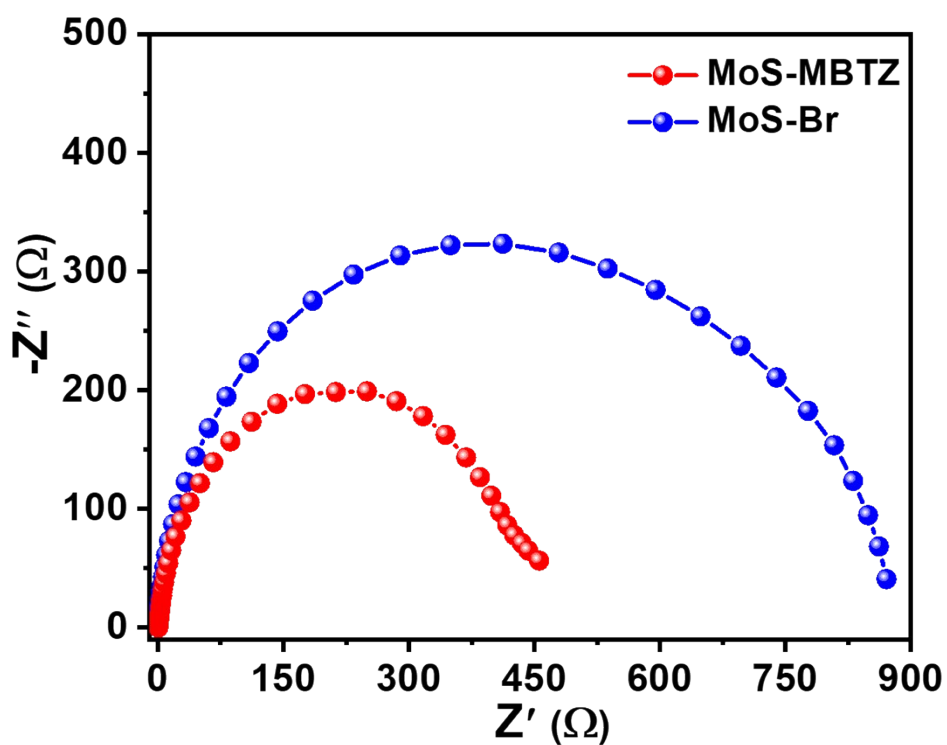

**Fig. S22** The EIS Nyquist plots for MoS-MBTZ and MoS-Br.

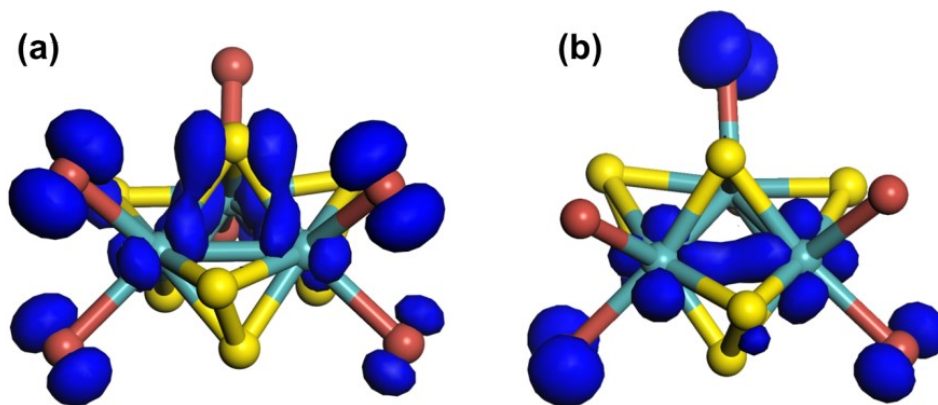

Fig. S23 The molecular orbitals of HOMO (a) and LUMO (b) for MoS-Br.

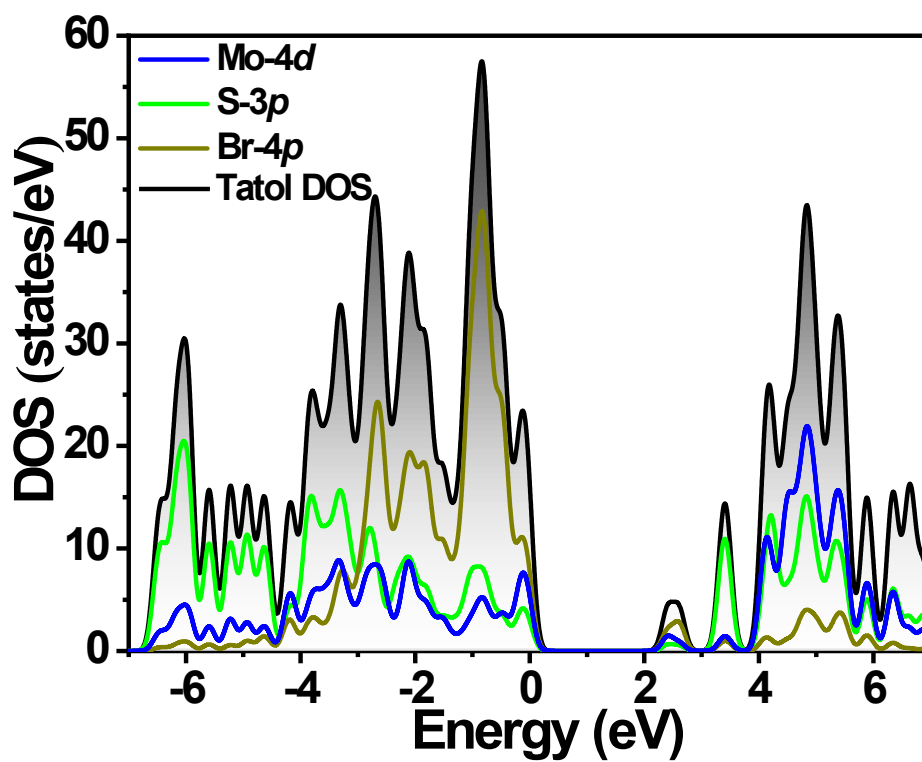

Fig. S24 The PDOS of Mo-4d, S-3p and Br-4p for MoS-Br.

**Table S1** Crystallographic data of MoS-MBTZ.

| <b>Compound</b>                                                 | <b>MoS-MBTZ</b>                                                                  |
|-----------------------------------------------------------------|----------------------------------------------------------------------------------|
| Formula                                                         | Mo <sub>3</sub> S <sub>13</sub> BrC <sub>21</sub> H <sub>12</sub> N <sub>3</sub> |
| Formula weight                                                  | 1090.85                                                                          |
| <i>T</i> (K)                                                    | 293                                                                              |
| Crystal system                                                  | Triclinic                                                                        |
| Space group                                                     | <i>P</i> -1                                                                      |
| <i>a</i> (Å)                                                    | 15.0168(5)                                                                       |
| <i>b</i> (Å)                                                    | 15.7598(5)                                                                       |
| <i>c</i> (Å)                                                    | 16.2940(5)                                                                       |
| $\alpha$ (°)                                                    | 75.247(3)                                                                        |
| $\beta$ (°)                                                     | 73.868(3)                                                                        |
| $\gamma$ (°)                                                    | 74.536(3)                                                                        |
| <i>V</i> (Å <sup>3</sup> )                                      | 3501.7(2)                                                                        |
| <i>Z</i>                                                        | 4                                                                                |
| <i>D<sub>c</sub></i> (g cm <sup>-3</sup> )                      | 2.069                                                                            |
| $\mu$ (mm <sup>-1</sup> )                                       | 3.00                                                                             |
| Reflns coll.                                                    | 12023                                                                            |
| Unique reflns                                                   | 7646                                                                             |
| <i>R</i> <sub>int</sub>                                         | 0.072                                                                            |
| <sup>a</sup> <i>R</i> <sub>I</sub> [ <i>I</i> ≥ 2σ( <i>I</i> )] | 0.061                                                                            |
| <sup>b</sup> <i>wR</i> <sub>2</sub> (all data)                  | 0.159                                                                            |
| GOF                                                             | 0.94                                                                             |

$${}^a R_I = \sum ||F_o| - |F_c|| / \sum |F_o|, \quad {}^b wR_2 = [\sum w(F_o^2 - F_c^2)^2 / \sum w(F_o^2)^2]^{1/2}.$$

**Table S2** Selected bond lengths (Å) and angles (°) of MoS-MBTZ.

|           |             |             |             |
|-----------|-------------|-------------|-------------|
| Mo1-Mo2   | 2.6958 (11) | Mo4-Mo5     | 2.6974 (12) |
| Mo1-Mo3   | 2.6978 (11) | Mo4-Mo6     | 2.6991 (14) |
| Mo1-S1    | 2.363 (2)   | Mo4-S14     | 2.362 (3)   |
| Mo1-S2    | 2.473 (2)   | Mo4-S15     | 2.470 (3)   |
| Mo1-S3    | 2.406 (2)   | Mo4-S16     | 2.402 (3)   |
| Mo1-S6    | 2.475 (2)   | Mo4-S17     | 2.466 (3)   |
| Mo1-S7    | 2.394 (3)   | Mo4-S18     | 2.397 (3)   |
| Mo1-S8    | 2.500 (3)   | Mo4-S21     | 2.513 (3)   |
| Mo1-N1    | 2.171 (7)   | Mo4-N4      | 2.197 (9)   |
| Mo2-Mo3   | 2.7034 (10) | Mo5-Mo6     | 2.7029 (12) |
| Mo2-S1    | 2.362 (2)   | Mo5-S14     | 2.361 (3)   |
| Mo2-S2    | 2.475 (3)   | Mo5-S17     | 2.475 (3)   |
| Mo2-S3    | 2.402 (2)   | Mo5-S18     | 2.409 (3)   |
| Mo2-S4    | 2.472 (3)   | Mo5-S19     | 2.475 (3)   |
| Mo2-S5    | 2.400 (3)   | Mo5-S20     | 2.413 (3)   |
| Mo2-S10   | 2.509 (3)   | Mo5-S23     | 2.490 (3)   |
| Mo2-N2    | 2.184 (7)   | Mo5-N5      | 2.183 (8)   |
| Mo3-S1    | 2.373 (3)   | Mo6-S14     | 2.364 (3)   |
| Mo3-S4    | 2.483 (3)   | Mo6-S15     | 2.479 (3)   |
| Mo3-S5    | 2.402 (3)   | Mo6-S16     | 2.412 (3)   |
| Mo3-S6    | 2.470 (3)   | Mo6-S19     | 2.465 (3)   |
| Mo3-S7    | 2.398 (2)   | Mo6-S20     | 2.414 (3)   |
| Mo3-S12   | 2.521 (3)   | Mo6-S25     | 2.509 (3)   |
| Mo3-N3    | 2.176 (8)   | Mo6-N6      | 2.187 (8)   |
| S1-Mo1-S2 | 84.99 (8)   | S14-Mo4-S15 | 84.98 (10)  |
| S1-Mo1-S3 | 110.33 (8)  | S14-Mo4-S16 | 110.58 (10) |
| S1-Mo1-S6 | 86.35 (8)   | S14-Mo4-S17 | 86.48 (10)  |
| S1-Mo1-S7 | 110.82 (9)  | S14-Mo4-S18 | 110.81 (9)  |
| S1-Mo1-S8 | 86.81 (9)   | S14-Mo4-S21 | 86.84 (11)  |
| S2-Mo1-S6 | 171.33 (9)  | S15-Mo4-S21 | 91.84 (11)  |
| S2-Mo1-S8 | 90.89 (9)   | S16-Mo4-S15 | 49.91 (10)  |
| S3-Mo1-S2 | 49.81 (8)   | S16-Mo4-S17 | 134.00 (10) |
| S3-Mo1-S6 | 133.90 (9)  | S16-Mo4-S21 | 133.57 (10) |
| S3-Mo1-S8 | 132.82 (9)  | S17-Mo4-S15 | 171.46 (11) |
| S6-Mo1-S8 | 89.11 (9)   | S17-Mo4-S21 | 87.95 (10)  |
| S7-Mo1-S2 | 133.80 (9)  | S18-Mo4-S15 | 133.85 (10) |
| S7-Mo1-S3 | 84.28 (9)   | S18-Mo4-S16 | 84.26 (10)  |

|             |             |             |             |
|-------------|-------------|-------------|-------------|
| S7-Mo1-S6   | 49.82 (9)   | S18-Mo4-S17 | 49.89 (9)   |
| S7-Mo1-S8   | 131.55 (9)  | S18-Mo4-S21 | 130.63 (11) |
| N1-Mo1-S1   | 152.1 (2)   | N4-Mo4-S14  | 151.7 (3)   |
| N1-Mo1-S2   | 92.7 (2)    | N4-Mo4-S15  | 95.4 (3)    |
| N1-Mo1-S3   | 88.6 (2)    | N4-Mo4-S16  | 90.4 (3)    |
| N1-Mo1-S6   | 95.2 (2)    | N4-Mo4-S17  | 92.2 (3)    |
| N1-Mo1-S7   | 90.8 (2)    | N4-Mo4-S18  | 89.2 (3)    |
| N1-Mo1-S8   | 65.4 (2)    | N4-Mo4-S21  | 64.9 (3)    |
| S3-Mo2-S2   | 49.83 (9)   | S14-Mo5-S17 | 86.31 (10)  |
| S1-Mo2-S3   | 110.52 (9)  | S14-Mo5-S18 | 110.43 (10) |
| S1-Mo2-S4   | 84.77 (9)   | S14-Mo5-S19 | 84.95 (10)  |
| S1-Mo2-S5   | 110.40 (9)  | S14-Mo5-S20 | 110.44 (10) |
| S1-Mo2-S10  | 87.42 (8)   | S14-Mo5-S23 | 85.44 (9)   |
| S2-Mo2-S10  | 88.49 (9)   | S17-Mo5-S19 | 171.17 (10) |
| S3-Mo2-Mo1  | 55.96 (6)   | S17-Mo5-S23 | 89.57 (10)  |
| S3-Mo2-S4   | 135.74 (9)  | S18-Mo5-S17 | 49.67 (9)   |
| S3-Mo2-S10  | 130.20 (9)  | S18-Mo5-S19 | 133.21 (9)  |
| S4-Mo2-S2   | 169.71 (9)  | S18-Mo5-S20 | 84.13 (10)  |
| S4-Mo2-S10  | 90.27 (9)   | S18-Mo5-S23 | 132.70 (11) |
| S19-Mo5-S23 | 90.98 (10)  | S20-Mo5-S17 | 133.64 (10) |
| S5-Mo2-S2   | 135.81 (9)  | S20-Mo5-S19 | 49.47 (9)   |
| S5-Mo2-S3   | 86.29 (9)   | S20-Mo5-S23 | 133.11 (11) |
| S5-Mo2-S4   | 49.77 (9)   | N5-Mo5-S14  | 150.2 (2)   |
| S5-Mo2-S10  | 131.73 (10) | N5-Mo5-S17  | 86.8 (2)    |
| N2-Mo2-S1   | 153.7 (2)   | N5-Mo5-S18  | 86.5 (2)    |
| N2-Mo2-S2   | 94.8 (2)    | N2-Mo2-S4   | 94.1 (2)    |
| N2-Mo2-S3   | 88.6 (2)    | N5-Mo5-S19  | 101.4 (2)   |
| N2-Mo2-S5   | 88.0 (2)    | N5-Mo5-S20  | 95.1 (2)    |
| N2-Mo2-S10  | 66.3 (2)    | N5-Mo5-S23  | 65.5 (2)    |
| S1-Mo3-S4   | 84.30 (9)   | S14-Mo6-S15 | 84.75 (9)   |
| S1-Mo3-S5   | 109.92 (8)  | S14-Mo6-S16 | 110.16 (10) |
| S1-Mo3-S6   | 86.23 (9)   | S14-Mo6-S19 | 85.11 (9)   |
| S1-Mo3-S7   | 110.34 (9)  | S14-Mo6-S20 | 110.31 (9)  |
| S1-Mo3-S12  | 88.40 (9)   | S14-Mo6-S25 | 86.76 (10)  |
| S4-Mo3-S12  | 91.84 (9)   | S15-Mo6-S25 | 88.51 (10)  |
| S5-Mo3-S4   | 49.62 (8)   | S16-Mo6-S15 | 49.70 (10)  |
| S5-Mo3-S6   | 134.63 (9)  | S16-Mo6-S19 | 135.38 (10) |
| S5-Mo3-S12  | 132.60 (10) | S16-Mo6-S20 | 86.11 (10)  |
| S6-Mo3-S4   | 170.53 (9)  | S16-Mo6-S25 | 130.54 (10) |

|            |            |             |             |
|------------|------------|-------------|-------------|
| S6-Mo3-S12 | 88.19 (9)  | S19-Mo6-S15 | 169.86 (10) |
| S7-Mo3-S4  | 134.19 (9) | S19-Mo6-S25 | 90.59 (10)  |
| S7-Mo3-S5  | 84.98 (9)  | S20-Mo6-S15 | 135.48 (11) |
| S7-Mo3-S6  | 49.83 (9)  | S20-Mo6-S19 | 49.58 (9)   |
| S7-Mo3-S12 | 130.23 (9) | S20-Mo6-S25 | 132.39 (11) |
| N3-Mo3-S1  | 154.0 (2)  | N6-Mo6-S14  | 152.7 (2)   |
| N3-Mo3-S4  | 97.0 (2)   | N6-Mo6-S15  | 90.9 (2)    |
| N3-Mo3-S5  | 89.9 (2)   | N6-Mo6-S16  | 86.7 (2)    |
| N3-Mo3-S6  | 91.7 (2)   | N6-Mo6-S19  | 98.0 (2)    |
| N3-Mo3-S7  | 87.4 (2)   | N6-Mo6-S20  | 91.6 (2)    |
| N3-Mo3-S12 | 65.6 (2)   | N6-Mo6-S25  | 66.2 (2)    |

**Table S3** Photocatalytic H<sub>2</sub> evolution from a mixed solution of different organic solvent and H<sub>2</sub>O at a volume ratio of 9:1.

| Solvent system                      | H <sub>2</sub> evolution Rate (mmol g <sup>-1</sup> ) | $\nu$ (H <sub>2</sub> ) (mmol g <sup>-1</sup> h <sup>-1</sup> ) |
|-------------------------------------|-------------------------------------------------------|-----------------------------------------------------------------|
| CH <sub>3</sub> CN-H <sub>2</sub> O | 509.04                                                | 101.81                                                          |
| DMF-H <sub>2</sub> O                | 147.03                                                | 29.41                                                           |
| MeOH-H <sub>2</sub> O               | 205.16                                                | 41.02                                                           |
| <i>i</i> -PrOH-H <sub>2</sub> O     | 117.84                                                | 23.57                                                           |
| Acetone-H <sub>2</sub> O            | 386.55                                                | 77.31                                                           |
| DMA-H <sub>2</sub> O                | 305.18                                                | 61.04                                                           |

**Table S4** Photocatalytic H<sub>2</sub> evolution from a mixed solution of CH<sub>3</sub>CN and H<sub>2</sub>O at a different volume ratio.

| Solvent volume ratio | H <sub>2</sub> evolution Rate (mmol g <sup>-1</sup> ) | $\nu$ (H <sub>2</sub> ) (mmol g <sup>-1</sup> h <sup>-1</sup> ) |
|----------------------|-------------------------------------------------------|-----------------------------------------------------------------|
| 9:1                  | 509.04                                                | 101.81                                                          |
| 7:3                  | 227.43                                                | 45.49                                                           |
| 5:5                  | 121.75                                                | 24.35                                                           |
| 3:7                  | 63.09                                                 | 12.62                                                           |
| 1:9                  | 23.30                                                 | 4.66                                                            |

**Table S5** Photocatalytic H<sub>2</sub> evolution from a mixed solution of CH<sub>3</sub>CN and H<sub>2</sub>O at a volume ratio of 9:1 with different electron donor.

| Electron donor | H <sub>2</sub> evolution Rate (mmol g <sup>-1</sup> ) | $\nu$ (H <sub>2</sub> ) (mmol g <sup>-1</sup> h <sup>-1</sup> ) |
|----------------|-------------------------------------------------------|-----------------------------------------------------------------|
| TEOA           | 509.04                                                | 101.81                                                          |
| TEA            | 135.81                                                | 27.16                                                           |
| Ascorbic acid  | 9.55                                                  | 1.91                                                            |
| Lactic acid    | 9.04                                                  | 1.81                                                            |



**Table S6** Summary of Mo-S clusters or MoS<sub>2</sub>-based photocatalysts for H<sub>2</sub> evolution of water splitting.

| Catalyst                                                                            | Photosensitizer or co-catalyst           | Light source                            | HER Rate ( $\mu\text{mol g}^{-1} \text{h}^{-1}$ ) | Ref.             |
|-------------------------------------------------------------------------------------|------------------------------------------|-----------------------------------------|---------------------------------------------------|------------------|
| <b>MoS-MBTZ</b>                                                                     | <b>Ru(bpy)<sub>3</sub>Cl<sub>2</sub></b> | <b><math>\geq 420 \text{ nm}</math></b> | <b>101800</b>                                     | <b>This work</b> |
| Mo <sub>3</sub> S <sub>13</sub> @EB-COF                                             | Ru(bpy) <sub>3</sub> Cl <sub>2</sub>     | $\geq 420 \text{ nm}$                   | 13215                                             | 4                |
| [Mo <sub>3</sub> S <sub>13</sub> ] <sup>2-</sup>                                    | Ru(bpy) <sub>3</sub> Cl <sub>2</sub>     | $\geq 420 \text{ nm}$                   | 28860                                             | 5                |
| [Mo <sub>3</sub> S <sub>7</sub> (S <sub>2</sub> CNEt <sub>2</sub> ) <sub>3</sub> ]I | Ru(bpy) <sub>3</sub> Cl <sub>2</sub>     | LEDs, 460 nm                            | 184.5                                             | 6                |
| SiW <sub>12</sub> -[Mo <sub>3</sub> S <sub>13</sub> ] <sup>2-</sup>                 | SiW <sub>12</sub>                        | 350-780 nm                              | 1395                                              | 7                |
| MoS <sub>2</sub> /PyP(IM)                                                           | PyP                                      | $\geq 420 \text{ nm}$                   | 540                                               | 8                |
| MoS <sub>2</sub> /TiO <sub>2</sub>                                                  | -                                        | 365 nm                                  | 2443                                              | 9                |
| Ti <sub>3</sub> C <sub>2</sub> (TiO <sub>2</sub> )@CdS/MoS <sub>2</sub>             | -                                        | $\geq 420 \text{ nm}$                   | 8470                                              | 10               |
| MoS <sub>2</sub> /ZnIn <sub>2</sub> S <sub>4</sub>                                  | -                                        | $\geq 420 \text{ nm}$                   | 3891.6                                            | 11               |
| g-C <sub>3</sub> N <sub>4</sub> /MoS <sub>2</sub> nanodot                           | -                                        | $\geq 420 \text{ nm}$                   | 660                                               | 12               |
| 1T-MoS <sub>2</sub> /O-g-C <sub>3</sub> N <sub>4</sub>                              | -                                        | $\geq 420 \text{ nm}$                   | 1841.7                                            | 13               |
| TiO <sub>2</sub> @MoS <sub>2</sub>                                                  | -                                        | $\geq 420 \text{ nm}$                   | 7571                                              | 14               |
| e-MoS <sub>2</sub> -Au <sub>CNC</sub> -CdS                                          | -                                        | $\geq 420 \text{ nm}$                   | 237.9                                             | 15               |
| 1T-MoS <sub>2</sub> /P25/NiO <sub>x</sub>                                           | -                                        | $\geq 420 \text{ nm}$                   | 16291                                             | 16               |

**Table S7** Control photocatalytic experiments using MoS-MBTZ as catalyst.

| Entry | Control Conditions                             | H <sub>2</sub> evolution Rate (mmol g <sup>-1</sup> ) | $\nu$ (H <sub>2</sub> ) (mmol g <sup>-1</sup> h <sup>-1</sup> ) |
|-------|------------------------------------------------|-------------------------------------------------------|-----------------------------------------------------------------|
| 1     | Without MoS-MBTZ                               | 28.56                                                 | 3.81                                                            |
| 2     | Without [Ru(bpy) <sub>3</sub> ]Cl <sub>2</sub> | 15.82                                                 | 1.58                                                            |
| 3     | Without TEOA                                   | 4.50                                                  | 0.18                                                            |
| 4     | Without light                                  | 5.03                                                  | 0.21                                                            |
| 5     | MoS-MBTZ                                       | 545.21                                                | 101.80                                                          |

## References

- [1] Z. Ji, C. Trickett, X. Pei, O. M. Yaghi, *J. Am. Chem. Soc.* **2018**, *140*, 13618-13622.
- [2] G. M. Sheldrick, SHELXT-Integrated Space-Group and Crystal-Structure Determination, *Acta Cryst.*, 2015, **A71**, 3-8.
- [3] M. D. Segall, P. J. D. Lindan, M. J. Probert, C. J. Pickard, P. J. Hasnip, S. J. Clark, M. C. Payne, *J. Phys. Condens. Matter.* 2002, **14**, 2717.
- [4] Y.-J. Cheng, R. Wang, S. Wang, X.-J. Xi, L.-F. Ma and S.-Q. Zang, *Chem. Commun.*, 2018, **54**, 13563-13566.
- [5] Y. Lei, M. Yang, J. Hou, F. Wang, E. Cui, C. Kong and S. Min, *Chem. Commun.*, 2018, **54**, 603-606.
- [6] P. R. Fontenot, B. Shan, B. Wang, S. Simpson, G. Ragunathan, A. F. Greene, A. Obanda, L. A. Hunt, N. I. Hammer, C. E. Webster, J. T. Mague, R. H. Schmehl and J. P. Donahue, *Inorg. Chem.*, 2019, **58**, 16458-16474.
- [7] W. Li, S. Min, F. Wang, Z. Zhang and D. Gao, *Chem. Commun.*, 2021, **57**, 1121-1124.
- [8] S. Zang, G. Zhang, Z.-A. Lan, D. Zheng and X. Wang, *Appl. Catal. B-Environ.*, 2019, **251**, 102-111.
- [9] W. Wang, S. Zhu, Y. Cao, Y. Tao, X. Li, D. Pan, D. L. Phillips, D. Zhang, M. Chen, G. Li and H. Li, *Adv. Funct. Mater.*, 2019, **29**, 1901958.
- [10] Z. Ai, Y. Shao, B. Chang, B. Huang, Y. Wu and X. Hao, *Appl. Catal. B-Environ.*, 2019, **242**, 202-208.
- [11] Z. Zhang, L. Huang, J. Zhang, F. Wang, Y. Xie, X. Shang, Y. Gu, H. Zhao and X. Wang, *Appl. Catal. B-Environ.*, 2018, **233**, 112-119.
- [12] X. Shi, M. Fujitsuka, S. Kim and T. Majima, *Small*, 2018, **14**, 1703277.
- [13] H. Xu, J. Yi, X. She, Q. Liu, L. Song, S. Chen, Y. Yang, Y. Song, R. Vajtai, J. Lou, H. Li, S. Yuan, J. Wu and P. M. Ajayan, *Appl. Catal. B-Environ.* 2018, **220**, 379-385.
- [14] L. Wang, X. Liu, J. Luo, X. Duan, J. Crittenden, C. Liu, S. Zhang, Y. Pei, Y. Zeng and X. Duan, *Angew. Chem. Int. Ed.* 2017, **56**, 7610-7614.
- [15] D. H. Wi, S. Y. Park, S. Lee, J. Sung, J. W. Hong and S. Woo Han, *J. Mater. Chem. A*, 2018, **6**, 13225-13235.
- [16] H. Lin, K. Zhang, G. Yang, Y. Li, X. Liu, K. Chang, Y. Xuan, J. Ye, *Appl. Catal. B-Environ.*, 2020, **279**, 119387.
